# Supplementary material
Source: publisher site journal article supplement (https://www.dovepress.com/article/supplementary_file/614979/614979_Supplementary%20table.docx)
Supplement: Supplementary file 1 [file 614979_Supplementary%20table.docx]

**Supplementary Table 1: Literature Review: Summary of Self-Management Concept Analysis**

| **S/N** | **AUTHOR/ COUNTRY** | **STUDY TYPE/ POPULATION** | **ANTECEDENTS** | **ATTRIBUTES** | **CONSEQUENCES** |
| --- | --- | --- | --- | --- | --- |
| 1 | Italy1 | Systematic review on self-care and self-management in chronic disease | Knowledge and information, inspiration, and social support | Proactive or guarded measures; reactive or response activities aimed at responding to symptoms or health-related occurrences. | Changes in physiological parameters, improved quality of life, self-worth, contentment, empowerment, and reduced medical costs. |
| 2 | Belgium, the Netherlands, Austria, and Switzerland2 | Concept analysis: self-management in hypertensive patients | Health knowledge and self-efficacy | Active engagement in care, taking responsibility, healthy coping strategies, disease and treatment knowledge, individualized care, expression of priorities and values, openness to social support, partnership with healthcare providers, and lifelong medical, role, and emotional management. | Improved health outcomes, reduced mortality, enhanced functional ability, improved quality of life, reduced healthcare costs, enhanced social engagement, improved personal experience, better health behaviors, improved self-efficacy, treatment compliance, and reduced healthcare resource use. |
| 3 | Japan3 | Rodgers’ evolutionary model of concept analysis of self-management in cancer patients | Physical functions, mental capacity, motivation, medical treatment, individualized education, family and professional support, and health literacy | Interaction with medical professionals, illness-management decision-making, problem-solving procedures, and self-efficacy. | Empowerment and well-being. |
| 4 | Canada4 | Concept analysis of self-management in multiple chronic diseases | Mental and physical capacity, desire to maintain independence, perseverance, and positive outlook. | Use of financial resources, learning from health professionals, use of ongoing social support, positive emotional and psychological response to health changes, engagement with the health system, and active participation in long-term disease monitoring and management. | Client empowerment, reduced caregiver burden, reduced stress among caregivers, decreased reliance on the health system, fewer emergency visits, better patient outcomes, and reduced healthcare costs. |
| 5 | USA5 | Concept and dimensional analysis: self-management in chronic illness | Knowledge, self-efficacy, encouragement, purpose, and shared commitment between the patient and healthcare professional. | Resources, expertise, following a strategy, involvement, and well-informed choices. | Improved quality of life, reduced healthcare costs, and better clinical outcomes. |
| 6 | Brazil6 | Concept analysis: self-management in patients with hypertension | Internal resources such as knowledge, attitude, discipline, and empowerment; external stimuli such as stress, nonadherence, and missed appointments. | Knowledge, disposition, self-control, self-efficacy, discipline, resolve, and dedication. | Improved co-ownership, supervision, management, and individualized treatment. |
| 7 | USA7 | Hybrid concept analysis: chronic disease self-management | Self-efficacy, disease knowledge, social support, health attitudes, motivation, coping mechanisms, and presence of a chronic condition. | Problem-solving, decision-making, use of resources, collaboration with medical professionals, taking action, and self-tailoring. | Improved illness state and severity, improved physiological parameters, reduced symptom frequency and intensity, fewer exacerbations, improved treatment compliance, reduced healthcare resource utilization, improved functional ability, and improved quality of life. |
| 8 | Iran8 | Concept analysis: self-management in end-stage kidney disease | Minimum mental and physical stability, health literacy, disease awareness, motivation, accountability, self-efficacy, emotional preparedness, coping skills, organized patient education, and clear communication from healthcare providers. | Emotional resilience and coping, real-time health adjustment, self-regulation, self-monitoring, therapeutic engagement, lifestyle integration, and adaptive problem-solving. | Improved quality of life, reduced complications, reduced hospitalization, lower mortality, reduced caregiver burden, stronger family support, improved family dynamics, reduced financial and emotional strain, optimized resource utilization, and fewer hospital visits. |
| 9 | Slovenia9 | Concept analysis: self-management in chronic illness | Effectiveness, education, motivation, sense of imbalance, religious beliefs and rules, dedication, judgment, resource availability, social support, experience, skills, habits, cultural values, cognitive and functional ability, self-confidence, and access to care. | Evaluation of changes in physical and emotional symptoms, response to change, consultation with nursing care providers, goal-setting, communication, focus on treatment efficacy, and situational awareness. | Improved clinical outcomes, reduced healthcare expenditure, improved quality of life, treatment adherence, reduced healthcare resource use, and improved functional capacity. |
| 10 | USA10 | Concept analysis: chronic illness self-management in diabetic patients | Self-efficacy and awareness of health risks and benefits of change. | Self-monitoring, setting realistic and personalized lifestyle goals, participating in intensive lifestyle modification activities, and receiving ongoing assistance from medical specialists. | Slowing disease progression. |
| 11 | Indonesia11 | Concept analysis: self-management in cancer patients | Health status, resources, environmental factors, personal/lifestyle traits, and healthcare systems. | Self-efficacy, goal-setting, compassion, and life satisfaction. | Improved quality of life, self-efficacy, and self-care. |
| 12 | Canada12 | Research note on identifying personalized barriers to hypertension self-management using the TASKS framework among hypertensive patients. The study analyzed transcripts from eight patients and hypertension guidelines. | Patient-specific circumstances, beliefs, emotional state, knowledge level, skills, stress, and access to resources. The barriers were categorized as emotional, knowledge-related, logical, and resource-related. | Hypertension self-management tasks requiring affect, skills, knowledge, and resources; use of blood pressure tools; home blood pressure monitoring; medication-related management; communication with healthcare providers; and individualized response to personal barriers. | Tailored interventions, improved patient-centered support, better home blood pressure monitoring, improved medication management, and improved hypertension self-management outcomes. |
| 13 | Indonesia13 | Qualitative literature review/concept analysis supported by case observations on self-management in hypertensive patients. The review included 20 articles published between 2024 and 2025 and compared the findings with three real-life hypertension cases. | Health literacy, family support, adaptive lifestyle changes, awareness of hypertension, self-confidence, behavioral motivation, community engagement, and access to technology. Barriers include resistance to behavioral change, denial of diagnosis, and low self-confidence. | Integration of health education, behavioral adaptation, social and psychological support, identification of patient barriers, personalized interventions, structured education, community engagement, and technology utilization. | Improved blood pressure control, improved quality of life, strengthened self-management skills, reduced disease burden, and optimized hypertension control. Poor self-management may contribute to uncontrolled hypertension and increased cardiovascular morbidity and mortality. |

References

1. Matarese M, Lommi M, De Marinis MG, Riegel B. A Systematic Review and Integration of Concept Analyses of Self‐Care and Related Concepts. *J Nurs Scholarsh*. 2018;50(3):296-305. doi:10.1111/jnu.12385

2. Van De Velde D, De Zutter F, Satink T, et al. Delineating the concept of self-management in chronic conditions: a concept analysis. *BMJ Open*. 2019;9(7):e027775. doi:10.1136/bmjopen-2018-027775

3. Yamanaka M. A Concept Analysis of Self-Management of Cancer Pain. *Asia-Pac J Oncol Nurs*. 2018;5(3):254-261. doi:10.4103/apjon.apjon_17_18

4. Garnett A, Ploeg J, Markle-Reid M, Strachan PH. Self-Management of Multiple Chronic Conditions by Community-Dwelling Older Adults: A Concept Analysis. *SAGE Open Nurs*. 2018;4:2377960817752471. doi:10.1177/2377960817752471

5. Udlis KA. Self-management in chronic illness: concept and dimensional analysis: Self-management in chronic illness: concept and dimensional analysis. *J Nurs Healthc Chronic Illn*. 2011;3(2):130-139. doi:10.1111/j.1752-9824.2011.01085.x

6. Balduino ADFA, Mantovani MDF, Lacerda MR, Meier MJ. Análise conceitual de autogestão do indivíduo hipertenso. *Rev Gaúcha Enferm*. 2013;34(4):37-44. doi:10.1590/S1983-14472013000400005

7. Miller WR, Lasiter S, Bartlett Ellis R, Buelow JM. Chronic disease self-management: A hybrid concept analysis. *Nurs Outlook*. 2015;63(2):154-161. doi:10.1016/j.outlook.2014.07.005

8. Rafiee-Vardanjani L, Arsalani N, Mohammadi-Shahbolaghi F, Norouzi Tabrizi K. Self-Management in Hemodialysis Patients: A Concept Analysis. *J Nurs Midwifery Sci*. 2025;12(2). doi:10.5812/jnms-158696

9. Gosak L, Vrbnjak D, Pajnkihar M. Self-management of chronic diseases: a concept analysis. *Pielegniarstwo XXI Wieku Nurs 21st Century*. 2022;21(2):115-121. doi:10.2478/pielxxiw-2022-0006

10. Rothenberger CD. Chronic Illness Self-Management in prediabetes: a concept analysis: Self-Management. *J Nurs Healthc Chronic Illn*. 2011;3(2):77-86. doi:10.1111/j.1752-9824.2011.01092.x

11. Aryani R, Lalisang TJ, Dahlia D, Martha E, Rustina Y, Pujasari H. Unpacking self-management in colorectal cancer with stoma patients: a comprehensive concept analysis. *Palliat Med Pract*. 2025;19(2):125-132. doi:10.5603/pmp.101549

12. Yang J, Zeng Y, Yang L, et al. Identifying personalized barriers for hypertension self-management from TASKS framework. *BMC Res Notes*. 2024;17(1):224. doi:10.1186/s13104-024-06893-7

13. Galuh Iriantono, Purwandari R, Amelia S, Pranata S, Aisah S, Vranada A. Analysis of the Concept of Self-Management in Hypertensive Patients. *KESANS Int J Health Sci*. 2025;4(12):1126-1137. doi:10.54543/kesans.v4i12.434
